# Supplementary material for: Plasmonic gold nanoparticle-decorated BiVO4/ZnO nanowire heterostructure photoanodes for efficient water oxidation
Source: Royal Society of Chemistry journal article supplement (doi:10.1039/c8cy00685g), 2018-01-01
Supplement: c8cy00685g1.pdf [file c8cy00685g1.pdf]

## Electronic Supplementary Information

### Plasmonic Gold Nanoparticles-Decorated BiVO<sub>4</sub>/ZnO Nanowire Heterostructure Photoanodes for Efficient Water Oxidation

Seungkyu Kim,<sup>a†</sup> Yejong Yu,<sup>a†</sup> Sang Yun Jeong,<sup>a</sup> Mi Gyoung Lee,<sup>b</sup> Hye Won Jeong,<sup>c</sup> Yeong Min Kwon,<sup>d</sup> Jeong Min Baik,<sup>d</sup>  
Hyunwoong Park,<sup>c</sup> Ho Won Jang,<sup>b</sup> Sanghan Lee <sup>a</sup>

<sup>a</sup> School of Material Science and Engineering, Gwangju Institute of Science and Technology, Gwangju, 61005, Republic of Korea, Email :  
sanghan@gist.ac.kr

<sup>b</sup> Department of Materials Science and Engineering, Seoul National University, 1 Gwanak-ro, Gwanak-gu, Seoul 08826, Republic of Korea

<sup>c</sup> School of Energy Engineering, Kyungpook National University, Daegu 702-701, Republic of Korea

<sup>d</sup> School of Material Science and Engineering, Ulsan National Institute of Science and Technology, Ulsan, 689-798, Republic of Korea

\*Corresponding Author: [sanghan@gist.ac.kr](mailto:sanghan@gist.ac.kr)

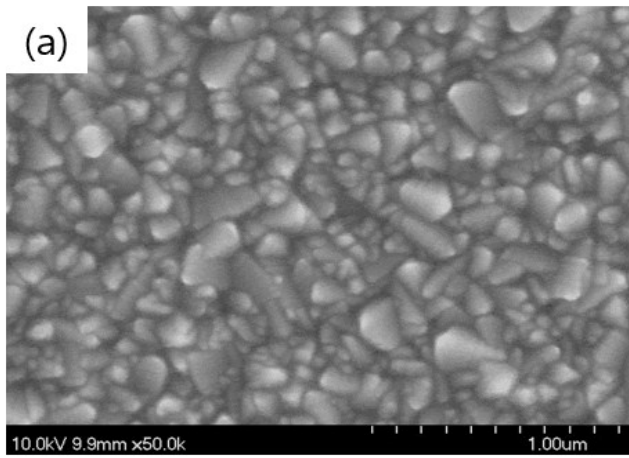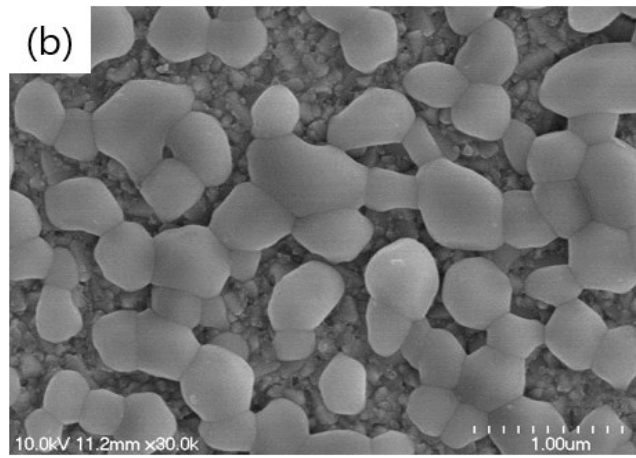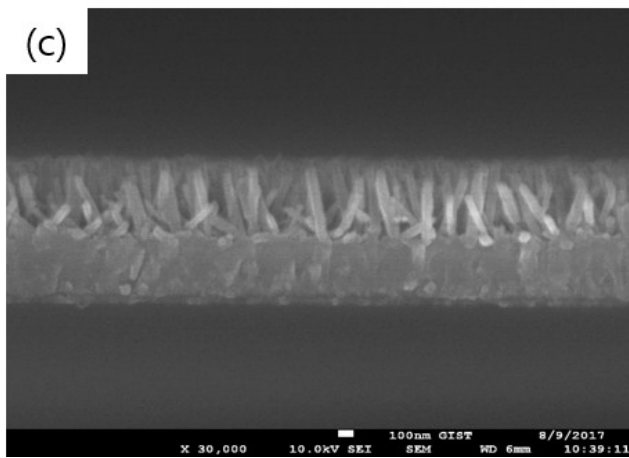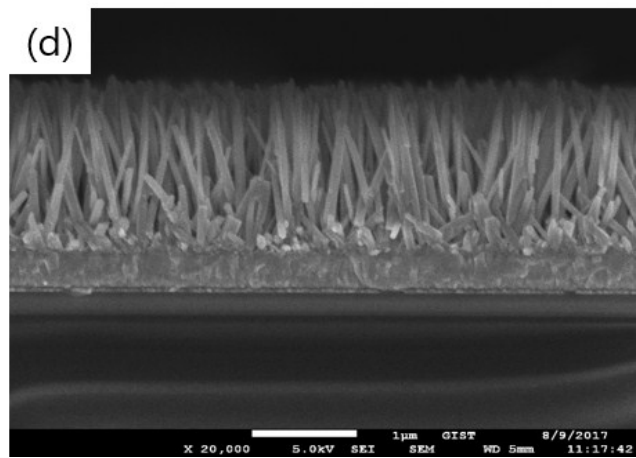

Fig. S1 The top-view and cross-sectional SEM images of (a) FTO, (b)  $\text{BiVO}_4/\text{FTO}$ , (c)  $\sim 0.5 \mu\text{m}$  ZnO NWs/FTO and (d)  $\sim 1.5 \mu\text{m}$  ZnO NWs/FTO

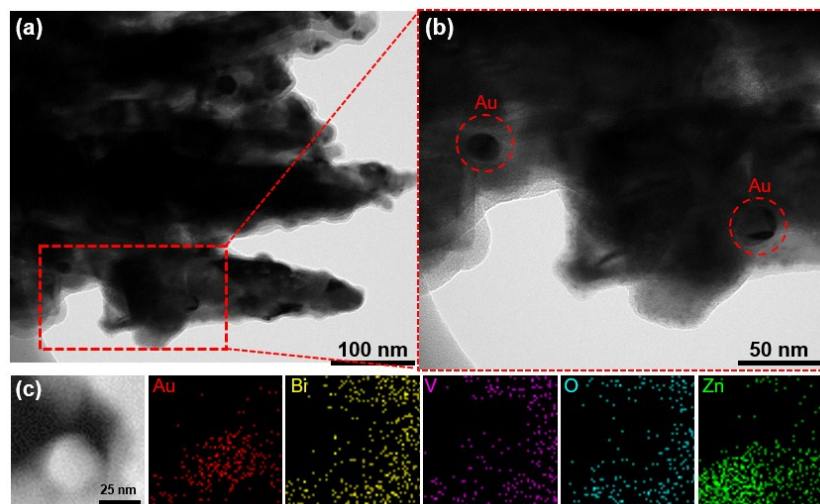

Fig. S2 TEM images and elemental mapping of Au/BiVO<sub>4</sub>/ZnO

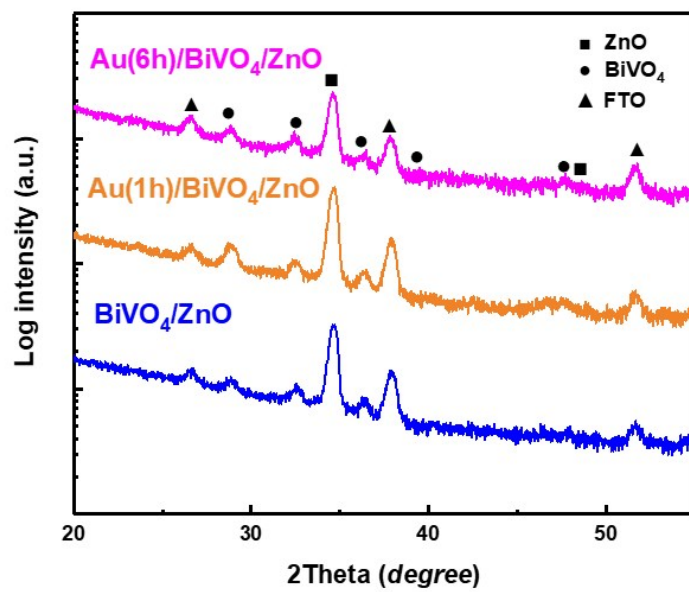

Fig. S3 X-ray diffraction patterns of BiVO<sub>4</sub>/ZnO NWs and Au(1h, 6h)/BiVO<sub>4</sub>/ZnO NWs

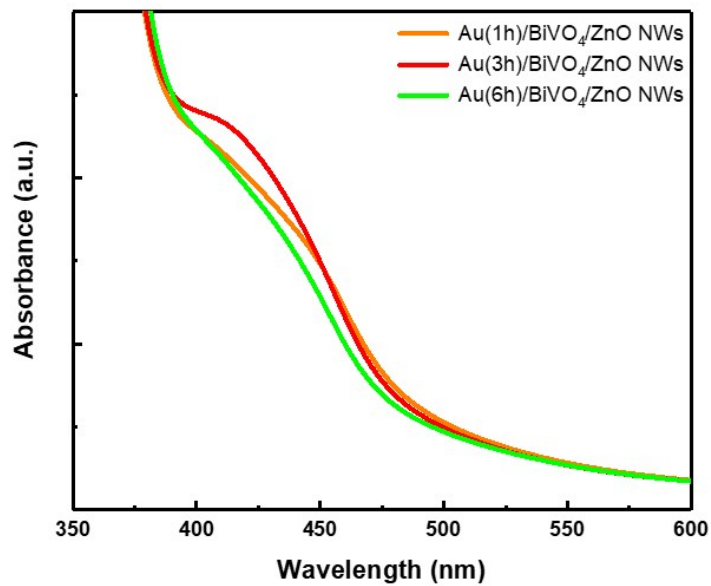

Fig. S4 Absorption spectra of BiVO<sub>4</sub>/ZnO NWs and Au/BiVO<sub>4</sub>/ZnO NWs with different NPs loading time

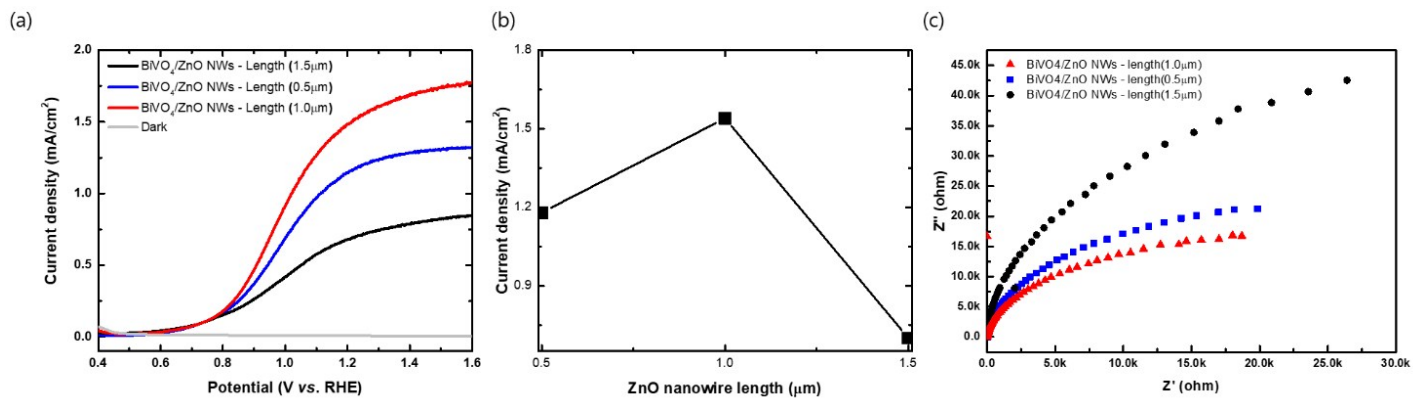

Fig. S5 (a) and (b) Photocurrent density-voltage curves, (c) electrochemical impedance spectroscopy (EIS) results of various length (~0.5, 1.0 and 1.5 μm) of ZnO NWs coated with BiVO<sub>4</sub>

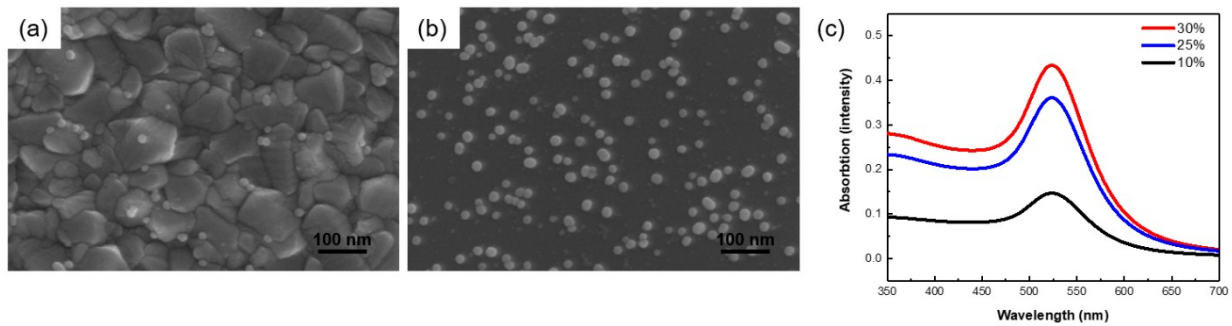

Fig. S6 (a) Au NPs on FTO glass and (b) Au NPs on Si substrate top-view SEM images, and (c) Absorption spectra of diluted Au NPs solution (10, 25, 35 v/v%)

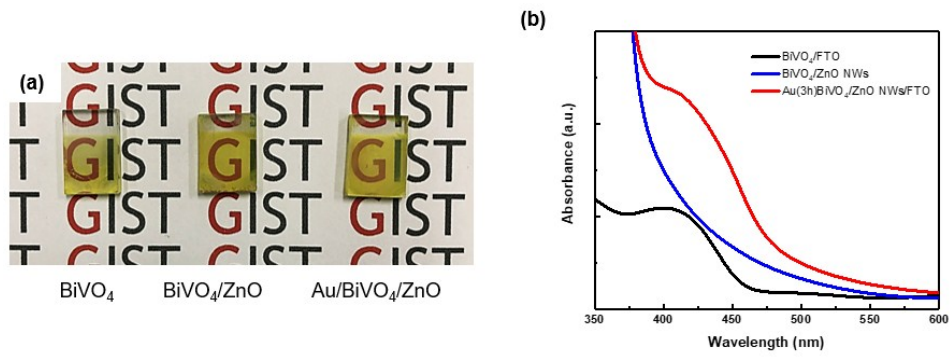

Fig.S7 (a) Optical image and (b) absorption spectra of BiVO<sub>4</sub>/FTO, BiVO<sub>4</sub>/ZnO NWs and Au/BiVO<sub>4</sub>/ZnO NWs, respectively



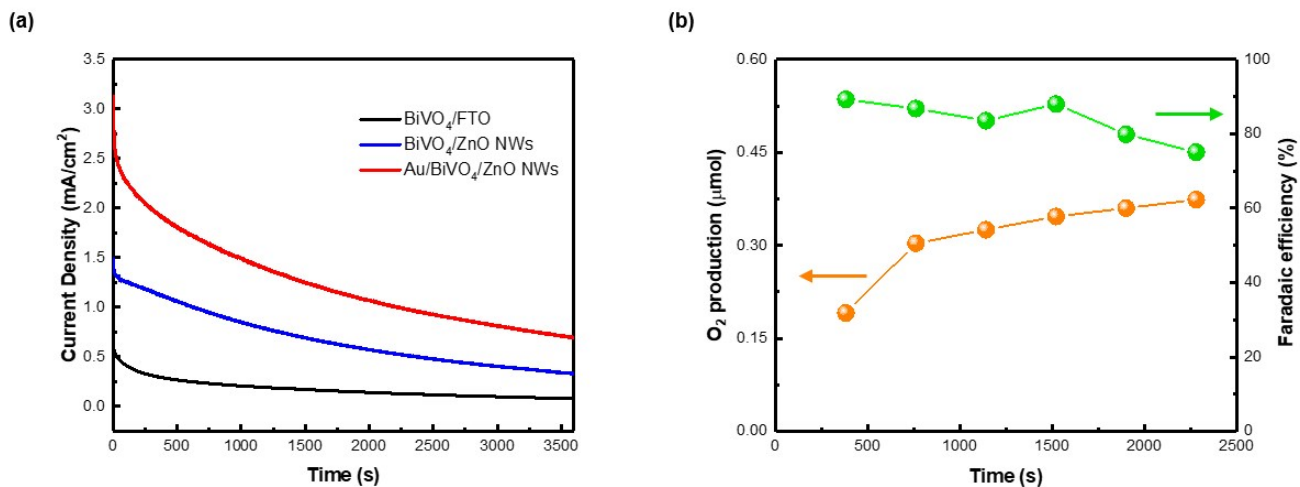

Fig. S8 (a) Photocurrent stability measurement of BiVO<sub>4</sub>/FTO, BiVO<sub>4</sub>/ZnO NWs, and Au/BiVO<sub>4</sub>/ZnO NWs photoanodes at an applied potential of 1.23 V vs. RHE and (b) O<sub>2</sub> production (left y-axis) and faradaic efficiency (right y-axis) of Au/BiVO<sub>4</sub>/ZnO NWs photoanode measured at 1.3 V vs. RHE in 0.5 M phosphate buffer solution under simulated AM 1.5G illumination.
